# Supplementary material for: Exploring the Relationship Between Multilayered Choroidal Neovascularization and Choriocapillaris Flow Deficits in AMD
Source: PubMed Central journal article supplement — Invest Ophthalmol Vis Sci. 2021 Mar 9;62(3):12. doi: 10.1167/iovs.62.3.12 (PMC7960838; doi:10.1167/iovs.62.3.12), 2021-03-09
Supplement: iovs-62-3-12_s002.pdf [file iovs-62-3-12_s002.pdf]

**Supplementary Table S2.** Relationship between CNV Complexity and Choriocapillaris Flow Deficits in Eyes with Type 1 ( $n=18$ ) and Type 2 ( $n=4$ ) CNV

| Location        | Flow Deficit Parameter | Threshold Technique | Average (SD) | Highest Flow |          | Flow Thickness |          | No. Flow Layers | Flow Layers 1-2 |          | Flow Layers 2-3 |          | Flow Layers 1-3 |          |
|-----------------|------------------------|---------------------|--------------|--------------|----------|----------------|----------|-----------------|-----------------|----------|-----------------|----------|-----------------|----------|
|                 |                        |                     |              | <i>r</i>     | <i>p</i> | <i>r</i>       | <i>p</i> |                 | <i>p</i>        | <i>z</i> | <i>p</i>        | <i>z</i> | <i>p</i>        | <i>z</i> |
| Outside Annulus | FD Count               | Phansalkar          | 333 (247)    | -.557*       | 0.007    | -.440*         | 0.040    | 0.010*          | -8.889*         | 0.009    | -1.159          | 0.723    | -10.048*        | 0.009    |
|                 | FD Count               | MinError(I)         | 242 (182)    | -.604*       | 0.003    | -.427*         | 0.047    | 0.005*          | -10.500*        | 0.002    | -0.952          | 0.771    | -9.548*         | 0.008    |
|                 | FDD                    | Phansalkar          | 0.42 (0.06)  | .459*        | 0.032    | .391           | 0.072    | 0.109           | -               | -        | -               | -        | -               | -        |
|                 | FDD                    | MinError(I)         | 0.41 (0.16)  | .321         | 0.145    | .371           | 0.089    | 0.094           | -               | -        | -               | -        | -               | -        |
|                 | MFDS                   | Phansalkar          | 95 (25)      | .437*        | 0.042    | .349           | 0.111    | 0.110           | -               | -        | -               | -        | -               | -        |
|                 | MFDS                   | MinError(I)         | 124 (79)     | .357         | 0.103    | .405           | 0.062    | 0.068           | -               | -        | -               | -        | -               | -        |
| Outside CNV     | FD Count               | Phansalkar          | 417 (242)    | -.517*       | 0.014    | -.421          | 0.051    | 0.014*          | -8.278*         | 0.016    | -1.508          | 0.645    | -9.786*         | 0.007    |
|                 | FD Count               | MinError(I)         | 309 (181)    | -.547*       | 0.008    | -.366          | 0.094    | 0.008*          | -10.056*        | 0.003    | -0.984          | 0.764    | -9.071*         | 0.012    |
|                 | FDD                    | Phansalkar          | 0.42 (0.06)  | .468*        | 0.028    | .406           | 0.063    | 0.058           | -               | -        | -               | -        | -               | -        |
|                 | FDD                    | MinError(I)         | 0.42 (0.15)  | .362         | 0.098    | .402           | 0.063    | 0.051           | -               | -        | -               | -        | -               | -        |
|                 | MFDS                   | Phansalkar          | 92 (21)      | .389         | 0.074    | .291           | 0.189    | 0.161           | -               | -        | -               | -        | -               | -        |
|                 | MFDS                   | MinError(I)         | 114 (59)     | .345         | 0.116    | .386           | 0.076    | 0.046*          | 8.444*          | 0.014    | -4.111          | 0.209    | 4.333           | 0.230    |
| Annulus         | FD Count               | Phansalkar          | 84 (31)      | .427*        | 0.047    | .301           | 0.173    | 0.081           | -               | -        | -               | -        | -               | -        |
|                 | FD Count               | MinError(I)         | 67 (30)      | .144         | 0.522    | .286           | 0.196    | 0.323           | -               | -        | -               | -        | -               | -        |
|                 | FDD                    | Phansalkar          | 0.45 (0.05)  | .192         | 0.392    | .226           | 0.312    | 0.261           | -               | -        | -               | -        | -               | -        |
|                 | FDD                    | MinError(I)         | 0.44 (0.16)  | .332         | 0.132    | .373           | 0.088    | 0.030*          | 8.944*          | 0.009    | -4.730          | 0.148    | 4.214           | 0.243    |
|                 | MFDS                   | Phansalkar          | 87 (16)      | .209         | 0.350    | .221           | 0.322    | 0.180           | -               | -        | -               | -        | -               | -        |
|                 | MFDS                   | MinError(I)         | 105 (58)     | .298         | 0.178    | .327           | 0.137    | 0.042*          | 8.611*          | 0.012    | -3.968          | 0.225    | 4.643           | 0.199    |

Correlation between flow deficit parameters and highest CNV flow or CNV flow thickness were performed with Spearman rank correlations reported with *r* and *p* values. Correlation between flow deficit parameters and the categorical value of number of flow layers were performed with the Kruskal-Wallis H Test (one-way ANOVA on ranks) with *p*-value reported. If the Kruskal-Wallis was significant, post-hoc Dunn test were reported for individual comparisons between layers with pairwise *z* test statistics and *p*-values. CNV = choroidal neovascularization, FD = flow deficit, FDD = flow deficit density, MFDS = mean flow deficit size, reported as diameter in microns. \* Statistical significance ( $P < 0.05$ ).
